# Supplementary material for: Development of a Mouse-Adapted Reporter SARS-CoV-2 as a Tool for Two-Photon In Vivo Imaging
Source: MDPI journal article supplement (doi:10.3390/v16040537), 2024-03-29
Supplement: s1 [file s1]

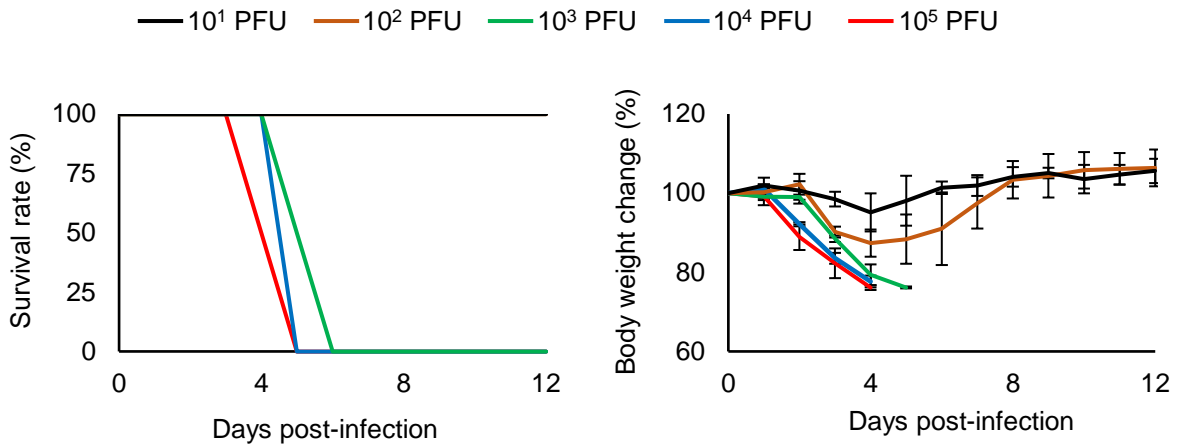

**Supplementary Figure S1.** Pathogenicity of MASCV2-p25 in young BALB/c mice. Survival rate (left panel) and body weight changes (right panel) of MASCV2-p25-infected mice. Four mice per group of young (6-week-old) BALB/c mice were intranasally infected with  $10^1$  to  $10^5$  PFU of MASCV2-p25, and survival and body weight were monitored daily for 12 days. The results are expressed as the mean  $\pm$  SD.
