# Supplementary figures and images for: Development of a Mouse-Adapted Reporter SARS-CoV-2 as a Tool for Two-Photon In Vivo Imaging
Source: MDPI journal article supplement (doi:10.3390/v16040537), 2024-03-29

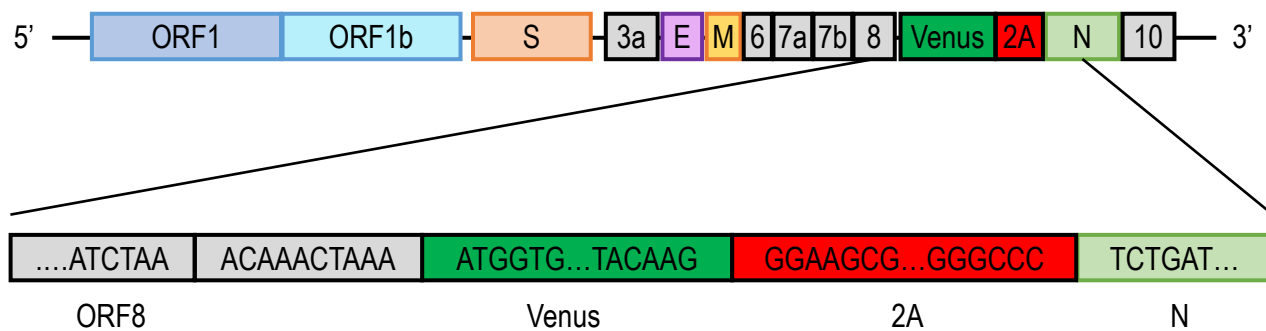

**Supplementary Figure S2.** Schematic representation of the BAC used to generate MASCV2-Venus.

Supplement: s1 [file s1]
